# Supplementary material for: Rare variable M. tuberculosis antigens induce predominant Th17 responses in human infection
Source: JCI journal article supplement (doi:10.1172/jci.insight.202134), 2026-01-27
Supplement: sd1 [file 1]

1 **Rare Variable *M. tuberculosis* Antigens induce predominant Th17 responses in human infection**

2  
3 Paul Ogongo<sup>1,2\*</sup>, Liya Wassie<sup>3</sup>, Anthony Tran<sup>1</sup>, Devin Columbus<sup>1#</sup>, Julia Huffaker<sup>1</sup>, Lisa Sharling<sup>4</sup>, Gregory  
4 Ouma<sup>5</sup>, Samuel Gurrion Ouma<sup>5</sup>, Kidist Bobosha<sup>3</sup>, Cecilia S. Lindestam Arlehamn<sup>6,7</sup>, Neel R. Gandhi<sup>4,8,9</sup>, Sara C.  
5 Auld<sup>4,9,12</sup>, Jyothi Rengarajan<sup>8,10</sup>, Cheryl L. Day<sup>10,11</sup>, Artur Quieroz<sup>13,14</sup>, Mariana Araújo-Perreira<sup>13,14</sup>, Eduardo  
6 Fukutani<sup>13,14</sup>, Bruno B. Andrade<sup>13,14</sup>, John D. Altman<sup>10</sup>, Henry M. Blumberg<sup>4,8,9</sup>, Joel D. Ernst<sup>1\*</sup> and the TBRU  
7 ASTRa Study Group

8  
9 <sup>1</sup>Division of Experimental Medicine, University of California, San Francisco, CA, USA

0 <sup>2</sup>Department of Tropical and Infectious Diseases, Kenya Institute of Primate Research, Nairobi, Kenya

1 <sup>3</sup>Mycobacterial Disease Research Directorate, Armauer Hansen Research Institute, Addis Ababa, Ethiopia

2 <sup>4</sup>Department of Epidemiology, Emory University Rollins School of Public Health, Atlanta, GA, USA

3 <sup>5</sup>Center for Global Health Research, Kenya Medical Research Institute, Kisumu, Kenya

4 <sup>6</sup>Center for Vaccine Innovation, La Jolla Institute for Immunology, La Jolla, CA, USA

5 <sup>7</sup>Department of Infectious Disease and Immunology, Center for Vaccine Research, Statens Serum Institut,  
6 Copenhagen, Denmark.

7 <sup>8</sup>Department of Medicine, Division of Infectious Diseases, Emory University School of Medicine, Atlanta, GA,  
8 USA

9 <sup>9</sup>Department of Global Health, Emory University Rollins School of Public Health, Atlanta, GA, USA,

0 <sup>10</sup>Emory Vaccine Center, Emory University, Atlanta, GA, USA

1 <sup>11</sup>Department of Microbiology and Immunology, Emory University School of Medicine, Atlanta, GA, USA

2 <sup>12</sup>Department of Medicine, Division of Pulmonary and Critical Care Medicine, Emory University School of  
3 Medicine, Atlanta, GA, USA

4 <sup>13</sup>Multinational Organization Network Sponsoring Translational and Epidemiological Research (MONSTER)  
5 Initiative, Salvador, Brazil

6 <sup>14</sup>Laboratório de Pesquisa Clínica e Translacional, Instituto Gonçalo Moniz, Fundação Oswaldo Cruz, Salvador,  
7 Brazil

8 #Present address: Vitamin Angels Alliance, Goleta, CA, USA

9 \*Joint corresponding authors:

0 **Paul Ogongo:**

1 University of California, San Francisco,

2 2540 23<sup>rd</sup> Street, Pride Hall, Room 3724

3 San Francisco, CA 94110

4 tel: 415-476-1227

5 [paul.ogongo@ucsf.edu](mailto:paul.ogongo@ucsf.edu)

6

7 **Joel D. Ernst:**

8 University of California, San Francisco,

9 2540 23<sup>rd</sup> Street, Pride Hall, Room 3724

0 San Francisco, CA 94110

1 tel: 415-476-1227

2 [joel.ernst@ucsf.edu](mailto:joel.ernst@ucsf.edu)

3

Tuberculosis Research Unit – Role of Antigen Specific T Cell Responses in the Control of TB (TBRU- ASTRa) Consortium Study members:

| <b>Name</b>                | <b>Affiliation</b>                                                                                                                                                                                 |
|----------------------------|----------------------------------------------------------------------------------------------------------------------------------------------------------------------------------------------------|
| Rafi Ahmed                 | Emory Vaccine Center, Emory University, Atlanta, GA, USA                                                                                                                                           |
| Lance Waller               | Department of Biostatistics and Bioinformatics, Rollins School of Public Health, Emory University, Atlanta, GA USA                                                                                 |
| Lisa Elon                  | Department of Biostatistics and Bioinformatics, Rollins School of Public Health, Emory University, Atlanta, GA USA                                                                                 |
| Andrea Knezevic            | Department of Biostatistics and Bioinformatics, Rollins School of Public Health, Emory University, Atlanta, GA USA                                                                                 |
| Shirin Jabbarzadeh         | Department of Biostatistics and Bioinformatics, Rollins School of Public Health, Emory University, Atlanta, GA USA                                                                                 |
| Azhar Nizam                | Department of Biostatistics and Bioinformatics, Rollins School of Public Health, Emory University, Atlanta, GA USA                                                                                 |
| Hao Wu                     | Department of Biostatistics, Rollins School of Public Health, Emory University, Atlanta, GA 30322                                                                                                  |
| Seegar Swanson             | Department of Biostatistics, Rollins School of Public Health, Emory University, Atlanta, GA 30322                                                                                                  |
| Yunyun Chen                | Department of Biostatistics, Rollins School of Public Health, Emory University, Atlanta, GA 30322                                                                                                  |
| Wendy Whatney              | Emory Vaccine Center, Emory University, Atlanta, GA, USA                                                                                                                                           |
| Melanie Quezada            | Emory Vaccine Center, Emory University, Atlanta, GA, USA                                                                                                                                           |
| Loren Sasser               | Emory Vaccine Center, Emory University, Atlanta, GA, USA                                                                                                                                           |
| Ranjna Madan Lala          | Emory Vaccine Center, Emory University, Atlanta, GA, USA                                                                                                                                           |
| Tawania Fergus             | Department of Medicine, New York University School of Medicine, New York, NY, USA. Present address: Division of Rheumatology, Albert Einstein College of Medicine, Bronx, NY                       |
| Toidi Adekambi             | Emory Vaccine Center, Emory University School of Medicine                                                                                                                                          |
| Deepak Kaushal             | Texas Biomedical Research Institute, San Antonio, TX, USA                                                                                                                                          |
| Nadia Golden               | Tulane National Primate Research Center, Tulane University School of Medicine, Covington, LA, USA                                                                                                  |
| Taylor Foreman             | Tulane National Primate Research Center, Tulane University School of Medicine, Covington, LA, USA                                                                                                  |
| Allison Bucsan             | Tulane National Primate Research Center, Tulane University School of Medicine, Covington, LA, USA. Present address: Vaccine Research Center, National Institute of Allergy and Infectious Diseases |
| Chris Ibegbu               | Emory Vaccine Center, Emory University, Atlanta, GA, USA                                                                                                                                           |
| Susanna Contraras Alcantra | Emory Vaccine Center, Emory University, Atlanta, GA, USA                                                                                                                                           |
| Alessandro Sette           | Center for Vaccine Innovation, La Jolla Institute for Immunology, La Jolla, CA, USA                                                                                                                |

|                       |                                                                                                                                                   |
|-----------------------|---------------------------------------------------------------------------------------------------------------------------------------------------|
| Salim Allana          | Department of Epidemiology, Emory University Rollins School of Public Health, Atlanta, GA, USA                                                    |
| Angela Campbell       | Department of Epidemiology, Emory University Rollins School of Public Health, Atlanta, GA, USA                                                    |
| Sarita Shah           | Department of Epidemiology, Emory University Rollins School of Public Health, Atlanta, GA, USA                                                    |
| Susan Ray             | Division of Infectious Diseases, Department of Medicine, Emory University School of Medicine, Atlanta, Georgia, USA.                              |
| James Brust           | Division of Infectious Diseases, Department of Medicine, Albert Einstein College of Medicine and Montefiore Medical Center, Bronx, New York, USA. |
| Jeffrey M. Collins    | Division of Infectious Diseases, Department of Medicine, Emory University School of Medicine, Atlanta, Georgia, USA.                              |
| Meghan Franczek       | Department of Epidemiology, Emory University Rollins School of Public Health, Atlanta, GA, USA                                                    |
| Jenna Daniel          | Department of Epidemiology, Emory University Rollins School of Public Health, Atlanta, GA, USA                                                    |
| Alison GC Smith       | Department of Epidemiology, Emory University Rollins School of Public Health, Atlanta, GA, USA                                                    |
| Anirudh Rao           | Department of Epidemiology, Rollins School of Public Health, Emory University                                                                     |
| Rebecca Goldstein     | Department of Epidemiology, Rollins School of Public Health, Emory University                                                                     |
| Madeleine Kabongo     | Department of Epidemiology, Emory University Rollins School of Public Health, Atlanta, GA, USA                                                    |
| Alawode Oladele       | DeKalb County Board of Health, Atlanta, GA, USA                                                                                                   |
| Janet Agaya           | Center for Global Health Research, Kenya Medical Research Institute, Kisumu, Kenya                                                                |
| Jeremiah Khayumbi     | Center for Global Health Research, Kenya Medical Research Institute, Kisumu, Kenya                                                                |
| Joan Tonui            | Center for Global Health Research, Kenya Medical Research Institute, Kisumu, Kenya                                                                |
| Benson Muchiri        | Center for Global Health Research, Kenya Medical Research Institute, Kisumu, Kenya                                                                |
| Joshua Ongalo         | Center for Global Health Research, Kenya Medical Research Institute, Kisumu, Kenya                                                                |
| Dickson Gethi         | Center for Global Health Research, Kenya Medical Research Institute, Kisumu, Kenya                                                                |
| Felix Hayara Odhiambo | Center for Global Health Research, Kenya Medical Research Institute, Kisumu, Kenya                                                                |
| Dorine Awilly         | Center for Global Health Research, Kenya Medical Research Institute, Kisumu, Kenya                                                                |
| Albert Ochieng Okumu  | Center for Global Health Research, Kenya Medical Research Institute, Kisumu, Kenya                                                                |
| Abraham Aseffa        | Mycobacterial Disease Research Directorate, Armauer Hansen Research Institute, Addis Ababa, Ethiopia                                              |

|                       |                                                                                                      |
|-----------------------|------------------------------------------------------------------------------------------------------|
| Medina Hamza          | Mycobacterial Disease Research Directorate, Armauer Hansen Research Institute, Addis Ababa, Ethiopia |
| Yonas Abebe           | Mycobacterial Disease Research Directorate, Armauer Hansen Research Institute, Addis Ababa, Ethiopia |
| Fisseha Mulate        | Mycobacterial Disease Research Directorate, Armauer Hansen Research Institute, Addis Ababa, Ethiopia |
| Mekdelawit Wondiyfraw | Mycobacterial Disease Research Directorate, Armauer Hansen Research Institute, Addis Ababa, Ethiopia |
| Firaol Degaga         | Mycobacterial Disease Research Directorate, Armauer Hansen Research Institute, Addis Ababa, Ethiopia |
| Daniel Getachew       | Mycobacterial Disease Research Directorate, Armauer Hansen Research Institute, Addis Ababa, Ethiopia |
| Dawit Tayachew Bere   | Mycobacterial Disease Research Directorate, Armauer Hansen Research Institute, Addis Ababa, Ethiopia |
| Meaza Zewdu           | Mycobacterial Disease Research Directorate, Armauer Hansen Research Institute, Addis Ababa, Ethiopia |
| Daniel Mussa          | Mycobacterial Disease Research Directorate, Armauer Hansen Research Institute, Addis Ababa, Ethiopia |
| Bezalam Tesfaye       | Mycobacterial Disease Research Directorate, Armauer Hansen Research Institute, Addis Ababa, Ethiopia |
| Selam Jemberu         | Mycobacterial Disease Research Directorate, Armauer Hansen Research Institute, Addis Ababa, Ethiopia |
| Azeb Tarekegn         | Mycobacterial Disease Research Directorate, Armauer Hansen Research Institute, Addis Ababa, Ethiopia |
| Gebeyehu Assefa       | Mycobacterial Disease Research Directorate, Armauer Hansen Research Institute, Addis Ababa, Ethiopia |
| Gutema Jebessa        | Mycobacterial Disease Research Directorate, Armauer Hansen Research Institute, Addis Ababa, Ethiopia |
| Zewdu Solomon         | Mycobacterial Disease Research Directorate, Armauer Hansen Research Institute, Addis Ababa, Ethiopia |
| Sebsibe Neway         | Mycobacterial Disease Research Directorate, Armauer Hansen Research Institute, Addis Ababa, Ethiopia |
| Jemal Hussein         | Mycobacterial Disease Research Directorate, Armauer Hansen Research Institute, Addis Ababa, Ethiopia |
| Tsegaye Hailu         | Mycobacterial Disease Research Directorate, Armauer Hansen Research Institute, Addis Ababa, Ethiopia |
| Alemayehu Geletu      | Mycobacterial Disease Research Directorate, Armauer Hansen Research Institute, Addis Ababa, Ethiopia |
| Edom Girma            | Mycobacterial Disease Research Directorate, Armauer Hansen Research Institute, Addis Ababa, Ethiopia |
| Million Legesse       | Mycobacterial Disease Research Directorate, Armauer Hansen Research Institute, Addis Ababa, Ethiopia |
| Mitin Wendaferew      | Mycobacterial Disease Research Directorate, Armauer Hansen Research Institute, Addis Ababa, Ethiopia |
| Hirut Solomon         | Mycobacterial Disease Research Directorate, Armauer Hansen Research Institute, Addis Ababa, Ethiopia |

|                    |                                                                                                      |
|--------------------|------------------------------------------------------------------------------------------------------|
| Zenebech Assefa    | Mycobacterial Disease Research Directorate, Armauer Hansen Research Institute, Addis Ababa, Ethiopia |
| Mahlet Mekuria     | Mycobacterial Disease Research Directorate, Armauer Hansen Research Institute, Addis Ababa, Ethiopia |
| Misker Kedir       | Mycobacterial Disease Research Directorate, Armauer Hansen Research Institute, Addis Ababa, Ethiopia |
| Eleni Zeleke       | Mycobacterial Disease Research Directorate, Armauer Hansen Research Institute, Addis Ababa, Ethiopia |
| Rediet Zerihun     | Mycobacterial Disease Research Directorate, Armauer Hansen Research Institute, Addis Ababa, Ethiopia |
| Selam Dechasa      | Mycobacterial Disease Research Directorate, Armauer Hansen Research Institute, Addis Ababa, Ethiopia |
| Emebet Haile       | Mycobacterial Disease Research Directorate, Armauer Hansen Research Institute, Addis Ababa, Ethiopia |
| Nahom Getachew     | Mycobacterial Disease Research Directorate, Armauer Hansen Research Institute, Addis Ababa, Ethiopia |
| Firaol Wagari      | Mycobacterial Disease Research Directorate, Armauer Hansen Research Institute, Addis Ababa, Ethiopia |
| Ruth Mekonnen      | Mycobacterial Disease Research Directorate, Armauer Hansen Research Institute, Addis Ababa, Ethiopia |
| Samuel Bayu        | Mycobacterial Disease Research Directorate, Armauer Hansen Research Institute, Addis Ababa, Ethiopia |
| Melat Gebre-Medhin | Mycobacterial Disease Research Directorate, Armauer Hansen Research Institute, Addis Ababa, Ethiopia |
| Alemayehu Kifle    | Mycobacterial Disease Research Directorate, Armauer Hansen Research Institute, Addis Ababa, Ethiopia |

4 **Supplementary materials**

Supplementary figure 1:

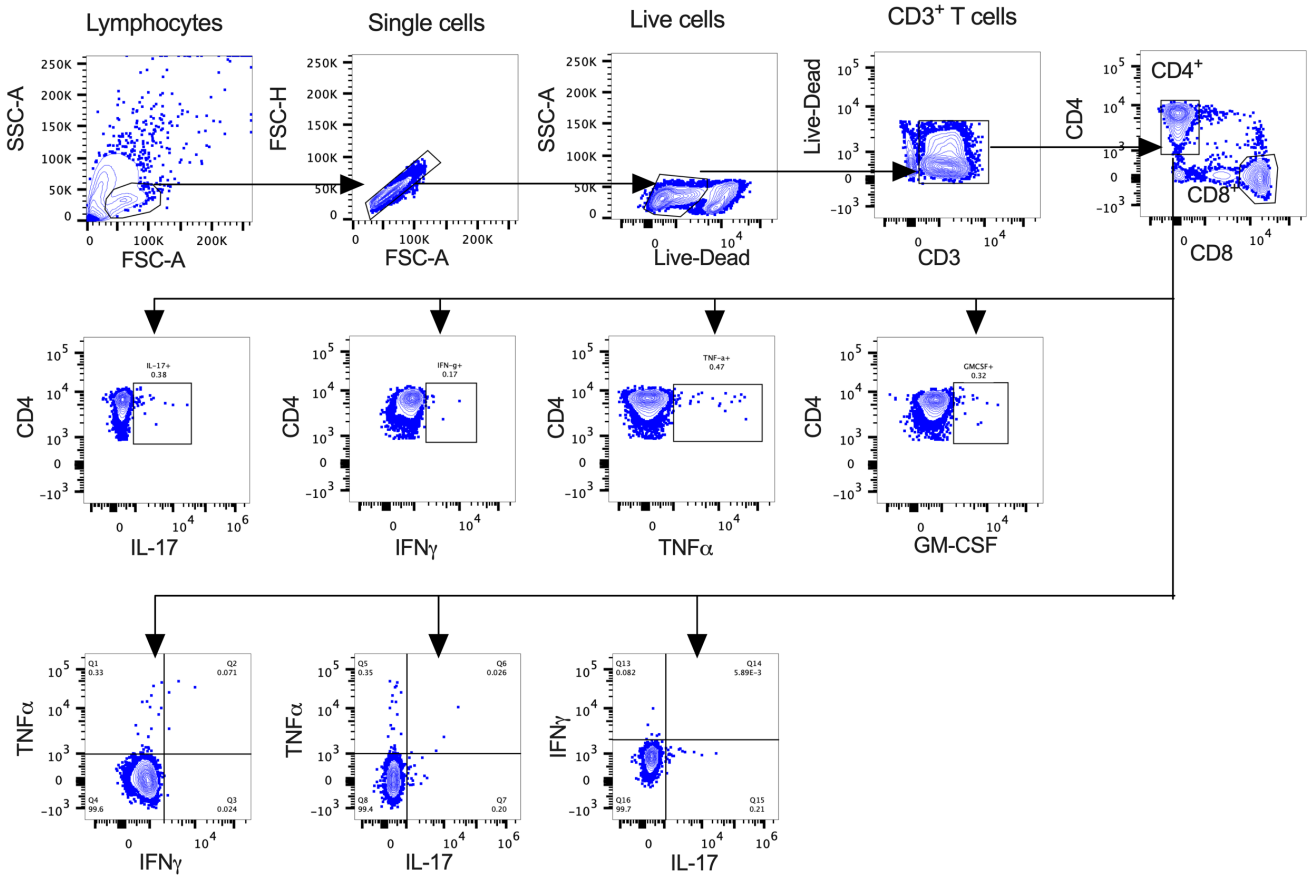

7 **Supplementary Figure 1: Identification of *Mtb*-specific CD4<sup>+</sup> T cells.** Gating strategy to detect cytokine-producing  
8 CD4<sup>+</sup> T cells after stimulation with distinct *Mtb* antigens. The shown strategy is for unstimulated PBMCs; the  
9 magnitude of *Mtb*-specific cytokine is reported after subtraction of the unstimulated background staining.

Supplementary figure 2:

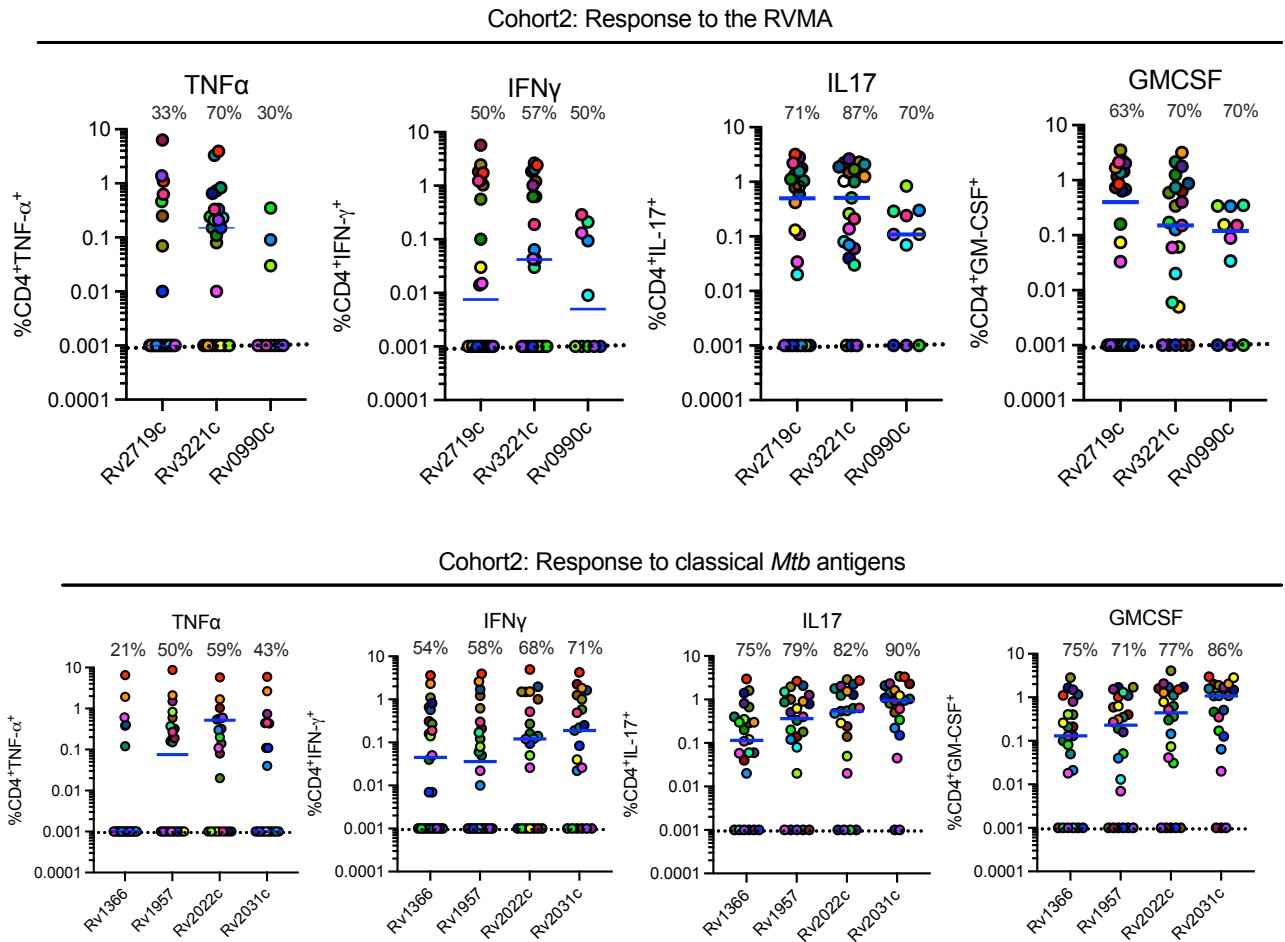

**Supplementary Figure 2: Distinct *Mtb* antigens elicit T cell responses with different functional properties (Cohort 2).** Procedures and analyses were as described in Figure 1; the samples were obtained from participants in Cohort 2 (AHRI, Addis Ababa, Ethiopia). Results for RVMA (Rv0990c, Rv2719c, and Rv3221c) are shown in the top panel; results for LICA (Rv1366, Rv1957, Rv2022c, and Rv2031c) are shown in the bottom panel.

Supplementary figure 3:

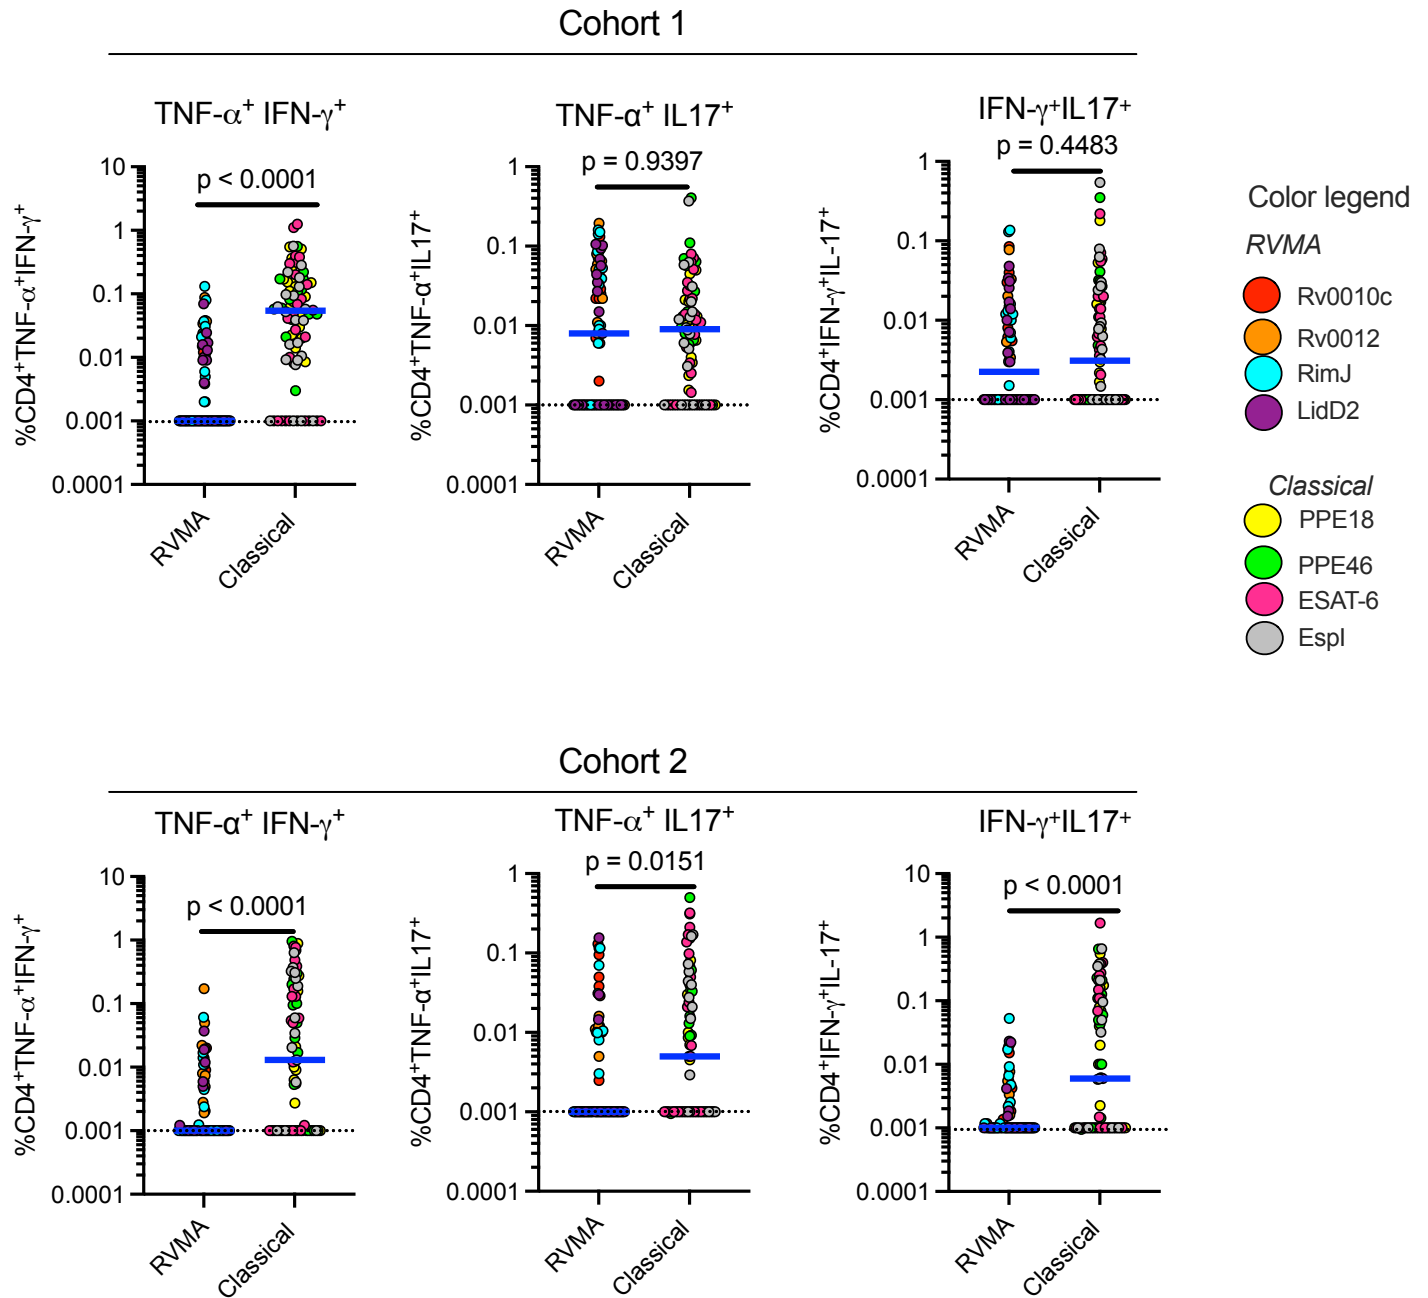

7

8 **Supplementary Figure 3: The RVMA induce significantly fewer bifunctional CD4<sup>+</sup> T cells.** Cryopreserved  
 9 PBMCs from participants in both cohorts were stimulated with distinct antigens (2 μg/ml) for a total of 20 hours in the  
 0 presence of Golgi Stop and Golgi Plug and costimulatory antibodies anti-CD28 and anti-CD49d and dual cytokine  
 1 production by CD4<sup>+</sup> T cells determined by intracellular cytokine staining. Each color code is for a distinct antigen as  
 2 indicated; blue line indicates the median cytokine response. Statistics: Mann-Whitney test.

3

4 Supplemental Table 1. Demographic and clinical characteristics of study cohorts

| Characteristic                                            | Cohort 1             | Cohort 2           | p*                                     |
|-----------------------------------------------------------|----------------------|--------------------|----------------------------------------|
| Age, Median (Interquartile range), Y                      | 31.5 (20, 49.5)      | 32.9 (26.7, 38.6)  | 0.6613                                 |
| Sex, n (%)                                                |                      |                    |                                        |
| Male                                                      | 15 (42%)             | 24 (56%)           | p = 0.2611,<br>Fisher's exact<br>test) |
| Female                                                    | 21 (58%)             | 19 (44%)           |                                        |
| BMI; Median (Interquartile range)                         | 21.95 (20.18, 26.58) | 21.80 (19.8, 24.7) | 0.8852                                 |
| HbA1c, %; Median (Interquartile range)                    | 5.5 (5.2,5.7)        | 5.3 (5, 6.1)       | 0.7467                                 |
| QFT Results, IU/mL; Median (Interquartile range)          |                      |                    |                                        |
| TB antigen minus Nil                                      | 9.03 (1.95, 10)      | 5.56 (2.2, 8.23)   | <b>0.0183</b>                          |
| Mitogen minus Nil                                         | 5.19 (2.09, 9.46)    | 8.78 (7.75, 9.72)  | <b>0.0011</b>                          |
| *p = Absolute p, Mann-Whitney unless otherwise specified. |                      |                    |                                        |

5

6 Supplemental Table 2. Cohort 2: Frequencies of CD4 T cell cytokine responses, by individual antigens

|                                                                                                                                                                                   | RVMA            |                |              |               | IFN $\gamma$ -dominant Classical |               |                |              |
|-----------------------------------------------------------------------------------------------------------------------------------------------------------------------------------|-----------------|----------------|--------------|---------------|----------------------------------|---------------|----------------|--------------|
|                                                                                                                                                                                   | Rv0010c<br>n=17 | Rv0012<br>n=24 | RimJ<br>n=29 | LldD2<br>n=13 | PPE18<br>n=21                    | PPE46<br>n=17 | ESAT-6<br>n=21 | EspI<br>n=14 |
| TNF                                                                                                                                                                               | 29              | 58             | 52           | 15            | 52                               | 71            | 86             | 86           |
| IFN $\gamma$                                                                                                                                                                      | 35              | 58             | 55           | 38            | 71                               | 82            | 86             | 93           |
| IL-17                                                                                                                                                                             | 59              | 58             | 62           | 54            | 67                               | 88            | 86             | 86           |
| GM-CSF                                                                                                                                                                            | 59              | 79             | 45           | 62            | 57                               | 82            | 71             | 79           |
| The values shown reflect the percent of participants whose samples yielded detectable responses, defined as >0.001% of CD4 T cells after stimulation with the indicated antigens. |                 |                |              |               |                                  |               |                |              |

7

8

9 Supplemental Table 3. Cohort 2: Frequencies of responders: individual cytokines vs antigen class

|              | Median % (interquartile range) n = 4 antigens per category |                                                  | Absolute p (Mann-Whitney) |
|--------------|------------------------------------------------------------|--------------------------------------------------|---------------------------|
|              | <b>RVMA</b>                                                | <b>IFN<math>\gamma</math>-dominant Classical</b> |                           |
| TNF          | 40 (19, 56)                                                | 78 (57, 85)                                      | 0.0571                    |
| IFN $\gamma$ | 51 (38, 57)                                                | 84 (74, 90)                                      | 0.0286                    |
| IL-17        | 58 (54, 61)                                                | 85 (71, 87)                                      | 0.0286                    |
| GM-CSF       | 60 (48, 75)                                                | 74 (61, 78)                                      | 0.6857                    |

0

1 Supplemental Table 4. Cohort 2: Magnitudes of individual cytokine responses (% of CD4 T cells) vs antigen

2 class

|              | Median % (interquartile range) n = 4 antigens per category |                                                  | Absolute p (Mann-Whitney) |
|--------------|------------------------------------------------------------|--------------------------------------------------|---------------------------|
|              | <b>RVMA</b>                                                | <b>IFN<math>\gamma</math>-dominant Classical</b> |                           |
| TNF          | 0.001 (0.001, 0.12)                                        | 0.35 (0.001, 0.8)                                | <0.0001                   |
| IFN $\gamma$ | 0.001 (0.001, 0.06)                                        | 0.3(0.05, 0.72)                                  | <0.0001                   |
| IL-17        | 0.04 (0.001, 0.24)                                         | 0.29 (0.09, 0.66)                                | <0.0001                   |
| GM-CSF       | 0.03 (0.001, 0.22)                                         | 0.13 (0.001, 0.32)                               | 0.0662                    |

Values shown for each cytokine and each antigen are median % of all CD4 T cells that express the specified cytokine. For statistical analyses, assays that yielded undetectable levels of the stated cytokine were assigned a value of 0.001%.

3

4

5 Supplemental Table 5. Cohort 2: IL-17 vs IFN $\gamma$  responses to individual RVMA

|                                                                                           | Response Frequencies (% of participants with detectable cytokine <sup>+</sup> CD4 T cells) |              | Response Magnitudes (% of CD4 T cells that are cytokine <sup>+</sup> )<br>Median (interquartile range) |                       | p*     |
|-------------------------------------------------------------------------------------------|--------------------------------------------------------------------------------------------|--------------|--------------------------------------------------------------------------------------------------------|-----------------------|--------|
|                                                                                           | IL-17                                                                                      | IFN $\gamma$ | IL-17                                                                                                  | IFN $\gamma$          |        |
| Rv0010c                                                                                   | 58                                                                                         | 35           | 0.02 (0.001, 0.115)                                                                                    | 0.001 (0.001, 0.047)  | 0.2437 |
| Rv0012                                                                                    | 58                                                                                         | 58           | 0.07 (0.001, 0.385)                                                                                    | 0.012 (0.001, 0.0775) | 0.0054 |
| RimJ                                                                                      | 62                                                                                         | 55           | 0.06 (0.001, 0.32)                                                                                     | 0.01 (0.001, 0.087)   | 0.2157 |
| LldD2                                                                                     | 63                                                                                         | 46           | 0.03 (0.001, 0.255)                                                                                    | 0.001 (0.001,0.0305)  | 0.0391 |
| Rv0990c                                                                                   | 70                                                                                         | 50           | 0.11 (0.001, 0.29)                                                                                     | 0.005 (0.001, 0.15)   | 0.0781 |
| Rv2719c                                                                                   | 71                                                                                         | 50           | 0.5 (0.001, 1.51)                                                                                      | 0.008 (0.001, 1.18)   | 0.1269 |
| Rv3221c                                                                                   | 87                                                                                         | 57           | 0.51 (0.06, 1.68)                                                                                      | 0.042 (0.001, 1.01)   | 0.0602 |
| *p values for the comparison of IL-17 vs IFN $\gamma$ magnitudes (Wilcoxon matched pairs) |                                                                                            |              |                                                                                                        |                       |        |

6

7 Supplemental Table 6. Cohort 2: Magnitudes of individual cytokine responses (% of CD4 T cells) vs antigen  
8 class

|                                                                                                                                                                                                                                                      | Median % (interquartile range) n = 3 RVMA and n = 4 LICA |                    | Absolute p (Wilcoxon matched pairs) |
|------------------------------------------------------------------------------------------------------------------------------------------------------------------------------------------------------------------------------------------------------|----------------------------------------------------------|--------------------|-------------------------------------|
|                                                                                                                                                                                                                                                      | IL-17                                                    | IFN $\gamma$       |                                     |
| RVMA                                                                                                                                                                                                                                                 | 0.26 (0.025, 1.35)                                       | 0.01 (0.001, 0.63) | 0.0059                              |
| LICA                                                                                                                                                                                                                                                 | 0.4 (0.05, 1.24)                                         | 0.08 (0.001, 0.58) | 0.0003                              |
| Values shown for each cytokine and each antigen class are median % of all CD4 T cells that express the specified cytokine. For statistical analyses, assays that yielded undetectable levels of the stated cytokine were assigned a value of 0.001%. |                                                          |                    |                                     |

9

Tuberculosis Research Unit – Role of Antigen Specific T Cell Responses in the Control of TB

(TBRU- ASTRa) Consortium Study members:

| <b>Name</b>                | <b>Affiliation</b>                                                                                                                                                                                 |
|----------------------------|----------------------------------------------------------------------------------------------------------------------------------------------------------------------------------------------------|
| Rafi Ahmed                 | Emory Vaccine Center, Emory University, Atlanta, GA, USA                                                                                                                                           |
| Lance Waller               | Department of Biostatistics and Bioinformatics, Rollins School of Public Health, Emory University, Atlanta, GA USA                                                                                 |
| Lisa Elon                  | Department of Biostatistics and Bioinformatics, Rollins School of Public Health, Emory University, Atlanta, GA USA                                                                                 |
| Andrea Knezevic            | Department of Biostatistics and Bioinformatics, Rollins School of Public Health, Emory University, Atlanta, GA USA                                                                                 |
| Shirin Jabbarzadeh         | Department of Biostatistics and Bioinformatics, Rollins School of Public Health, Emory University, Atlanta, GA USA                                                                                 |
| Azhar Nizam                | Department of Biostatistics and Bioinformatics, Rollins School of Public Health, Emory University, Atlanta, GA USA                                                                                 |
| Hao Wu                     | Department of Biostatistics, Rollins School of Public Health, Emory University, Atlanta, GA 30322                                                                                                  |
| Seegar Swanson             | Department of Biostatistics, Rollins School of Public Health, Emory University, Atlanta, GA 30322                                                                                                  |
| Yunyun Chen                | Department of Biostatistics, Rollins School of Public Health, Emory University, Atlanta, GA 30322                                                                                                  |
| Wendy Whatney              | Emory Vaccine Center, Emory University, Atlanta, GA, USA                                                                                                                                           |
| Melanie Quezada            | Emory Vaccine Center, Emory University, Atlanta, GA, USA                                                                                                                                           |
| Loren Sasser               | Emory Vaccine Center, Emory University, Atlanta, GA, USA                                                                                                                                           |
| Ranjna Madan Lala          | Emory Vaccine Center, Emory University, Atlanta, GA, USA                                                                                                                                           |
| Tawania Fergus             | Department of Medicine, New York University School of Medicine, New York, NY, USA. Present address: Division of Rheumatology, Albert Einstein College of Medicine, Bronx, NY                       |
| Toidi Adekambi             | Emory Vaccine Center, Emory University School of Medicine                                                                                                                                          |
| Deepak Kaushal             | Texas Biomedical Research Institute, San Antonio, TX, USA                                                                                                                                          |
| Nadia Golden               | Tulane National Primate Research Center, Tulane University School of Medicine, Covington, LA, USA                                                                                                  |
| Taylor Foreman             | Tulane National Primate Research Center, Tulane University School of Medicine, Covington, LA, USA                                                                                                  |
| Allison Bucsan             | Tulane National Primate Research Center, Tulane University School of Medicine, Covington, LA, USA. Present address: Vaccine Research Center, National Institute of Allergy and Infectious Diseases |
| Chris Ibegbu               | Emory Vaccine Center, Emory University, Atlanta, GA, USA                                                                                                                                           |
| Susanna Contraras Alcantra | Emory Vaccine Center, Emory University, Atlanta, GA, USA                                                                                                                                           |

|                       |                                                                                                                                                   |
|-----------------------|---------------------------------------------------------------------------------------------------------------------------------------------------|
| Alessandro Sette      | Center for Vaccine Innovation, La Jolla Institute for Immunology, La Jolla, CA, USA                                                               |
| Salim Allana          | Department of Epidemiology, Emory University Rollins School of Public Health, Atlanta, GA, USA                                                    |
| Angela Campbell       | Department of Epidemiology, Emory University Rollins School of Public Health, Atlanta, GA, USA                                                    |
| Sarita Shah           | Department of Epidemiology, Emory University Rollins School of Public Health, Atlanta, GA, USA                                                    |
| Susan Ray             | Division of Infectious Diseases, Department of Medicine, Emory University School of Medicine, Atlanta, Georgia, USA.                              |
| James Brust           | Division of Infectious Diseases, Department of Medicine, Albert Einstein College of Medicine and Montefiore Medical Center, Bronx, New York, USA. |
| Jeffrey M. Collins    | Division of Infectious Diseases, Department of Medicine, Emory University School of Medicine, Atlanta, Georgia, USA.                              |
| Meghan Franczek       | Department of Epidemiology, Emory University Rollins School of Public Health, Atlanta, GA, USA                                                    |
| Jenna Daniel          | Department of Epidemiology, Emory University Rollins School of Public Health, Atlanta, GA, USA                                                    |
| Alison GC Smith       | Department of Epidemiology, Emory University Rollins School of Public Health, Atlanta, GA, USA                                                    |
| Anirudh Rao           | Department of Epidemiology, Rollins School of Public Health, Emory University                                                                     |
| Rebecca Goldstein     | Department of Epidemiology, Rollins School of Public Health, Emory University                                                                     |
| Madeleine Kabongo     | Department of Epidemiology, Emory University Rollins School of Public Health, Atlanta, GA, USA                                                    |
| Alawode Oladele       | DeKalb County Board of Health, Atlanta, GA, USA                                                                                                   |
| Janet Agaya           | Center for Global Health Research, Kenya Medical Research Institute, Kisumu, Kenya                                                                |
| Jeremiah Khayumbi     | Center for Global Health Research, Kenya Medical Research Institute, Kisumu, Kenya                                                                |
| Joan Tonui            | Center for Global Health Research, Kenya Medical Research Institute, Kisumu, Kenya                                                                |
| Benson Muchiri        | Center for Global Health Research, Kenya Medical Research Institute, Kisumu, Kenya                                                                |
| Joshua Ongalo         | Center for Global Health Research, Kenya Medical Research Institute, Kisumu, Kenya                                                                |
| Dickson Gethi         | Center for Global Health Research, Kenya Medical Research Institute, Kisumu, Kenya                                                                |
| Felix Hayara Odhiambo | Center for Global Health Research, Kenya Medical Research Institute, Kisumu, Kenya                                                                |
| Dorine Awilly         | Center for Global Health Research, Kenya Medical Research Institute, Kisumu, Kenya                                                                |
| Albert Ochieng Okumu  | Center for Global Health Research, Kenya Medical Research Institute, Kisumu, Kenya                                                                |

|                       |                                                                                                      |
|-----------------------|------------------------------------------------------------------------------------------------------|
| Abraham Aseffa        | Mycobacterial Disease Research Directorate, Armauer Hansen Research Institute, Addis Ababa, Ethiopia |
| Medina Hamza          | Mycobacterial Disease Research Directorate, Armauer Hansen Research Institute, Addis Ababa, Ethiopia |
| Yonas Abebe           | Mycobacterial Disease Research Directorate, Armauer Hansen Research Institute, Addis Ababa, Ethiopia |
| Fisseha Mulate        | Mycobacterial Disease Research Directorate, Armauer Hansen Research Institute, Addis Ababa, Ethiopia |
| Mekdelawit Wondiyfraw | Mycobacterial Disease Research Directorate, Armauer Hansen Research Institute, Addis Ababa, Ethiopia |
| Firaol Degaga         | Mycobacterial Disease Research Directorate, Armauer Hansen Research Institute, Addis Ababa, Ethiopia |
| Daniel Getachew       | Mycobacterial Disease Research Directorate, Armauer Hansen Research Institute, Addis Ababa, Ethiopia |
| Dawit Tayachew Bere   | Mycobacterial Disease Research Directorate, Armauer Hansen Research Institute, Addis Ababa, Ethiopia |
| Meaza Zewdu           | Mycobacterial Disease Research Directorate, Armauer Hansen Research Institute, Addis Ababa, Ethiopia |
| Daniel Mussa          | Mycobacterial Disease Research Directorate, Armauer Hansen Research Institute, Addis Ababa, Ethiopia |
| Bezalam Tesfaye       | Mycobacterial Disease Research Directorate, Armauer Hansen Research Institute, Addis Ababa, Ethiopia |
| Selam Jemberu         | Mycobacterial Disease Research Directorate, Armauer Hansen Research Institute, Addis Ababa, Ethiopia |
| Azeb Tarekegn         | Mycobacterial Disease Research Directorate, Armauer Hansen Research Institute, Addis Ababa, Ethiopia |
| Gebeyehu Assefa       | Mycobacterial Disease Research Directorate, Armauer Hansen Research Institute, Addis Ababa, Ethiopia |
| Gutema Jebessa        | Mycobacterial Disease Research Directorate, Armauer Hansen Research Institute, Addis Ababa, Ethiopia |
| Zewdu Solomon         | Mycobacterial Disease Research Directorate, Armauer Hansen Research Institute, Addis Ababa, Ethiopia |
| Sebsibe Neway         | Mycobacterial Disease Research Directorate, Armauer Hansen Research Institute, Addis Ababa, Ethiopia |
| Jemal Hussein         | Mycobacterial Disease Research Directorate, Armauer Hansen Research Institute, Addis Ababa, Ethiopia |
| Tsegaye Hailu         | Mycobacterial Disease Research Directorate, Armauer Hansen Research Institute, Addis Ababa, Ethiopia |
| Alemayehu Geletu      | Mycobacterial Disease Research Directorate, Armauer Hansen Research Institute, Addis Ababa, Ethiopia |
| Edom Girma            | Mycobacterial Disease Research Directorate, Armauer Hansen Research Institute, Addis Ababa, Ethiopia |
| Million Legesse       | Mycobacterial Disease Research Directorate, Armauer Hansen Research Institute, Addis Ababa, Ethiopia |
| Mitin Wendaferew      | Mycobacterial Disease Research Directorate, Armauer Hansen Research Institute, Addis Ababa, Ethiopia |

|                    |                                                                                                      |
|--------------------|------------------------------------------------------------------------------------------------------|
| Hirut Solomon      | Mycobacterial Disease Research Directorate, Armauer Hansen Research Institute, Addis Ababa, Ethiopia |
| Zenebech Assefa    | Mycobacterial Disease Research Directorate, Armauer Hansen Research Institute, Addis Ababa, Ethiopia |
| Mahlet Mekuria     | Mycobacterial Disease Research Directorate, Armauer Hansen Research Institute, Addis Ababa, Ethiopia |
| Misker Kedir       | Mycobacterial Disease Research Directorate, Armauer Hansen Research Institute, Addis Ababa, Ethiopia |
| Eleni Zeleke       | Mycobacterial Disease Research Directorate, Armauer Hansen Research Institute, Addis Ababa, Ethiopia |
| Rediet Zerihun     | Mycobacterial Disease Research Directorate, Armauer Hansen Research Institute, Addis Ababa, Ethiopia |
| Selam Dechasa      | Mycobacterial Disease Research Directorate, Armauer Hansen Research Institute, Addis Ababa, Ethiopia |
| Emebet Haile       | Mycobacterial Disease Research Directorate, Armauer Hansen Research Institute, Addis Ababa, Ethiopia |
| Nahom Getachew     | Mycobacterial Disease Research Directorate, Armauer Hansen Research Institute, Addis Ababa, Ethiopia |
| Firaol Wagari      | Mycobacterial Disease Research Directorate, Armauer Hansen Research Institute, Addis Ababa, Ethiopia |
| Ruth Mekonnen      | Mycobacterial Disease Research Directorate, Armauer Hansen Research Institute, Addis Ababa, Ethiopia |
| Samuel Bayu        | Mycobacterial Disease Research Directorate, Armauer Hansen Research Institute, Addis Ababa, Ethiopia |
| Melat Gebre-Medhin | Mycobacterial Disease Research Directorate, Armauer Hansen Research Institute, Addis Ababa, Ethiopia |
| Alemayehu Kifle    | Mycobacterial Disease Research Directorate, Armauer Hansen Research Institute, Addis Ababa, Ethiopia |
